# Supplementary material for: Evidence-based recommendations for economic evaluations in spine surgery: study protocol for a Delphi consensus
Source: PubMed Central journal article supplement — BMJ Open. 2021 Dec 23;11(12):e052988. doi: 10.1136/bmjopen-2021-052988 (PMC8704951; doi:10.1136/bmjopen-2021-052988), 2021-12-23
Supplement: bmjopen-2021-052988supp001.pdf [file bmjopen-2021-052988supp001.pdf]

## Appendix A – Search Query

### (a) Study population

Spine[Title/Abstract] OR Vertebra\*[Title/Abstract] OR cervical spine[Title/Abstract] OR Facet joint[Title/Abstract] OR Cervical vertebrae[Title/Abstract] OR thoracic vertebrae[Title/Abstract] OR lumbar vertebrae[Title/Abstract] OR thoracic spine[Title/Abstract] OR lumbar spine[Title/Abstract] OR sacro\*[Title/Abstract] OR spinal sacrum[Title/Abstract] OR sacral[Title/Abstract] OR thoracolumbar[Title/Abstract] OR cervicothoracic[Title/Abstract] OR craniocervical[Title/Abstract] OR intervertebral[Title/Abstract] OR Spondyl\* Osteoarthritis, Spine[Title/Abstract] OR radiculopath\*[Title/Abstract] OR myelopath\*[Title/Abstract] OR herniated disc[Title/Abstract] OR herniated disk[Title/Abstract] OR bulged disc[Title/Abstract] OR slipped disc[Title/Abstract] OR ruptured disc[Title/Abstract] OR nerve root[Title/Abstract] OR kyphos\*[Title/Abstract] OR lordosis[Title/Abstract] OR listhes\*[Title/Abstract] OR laterolisthes\*[Title/Abstract] OR scolios\*[Title/Abstract] OR anterolisthes\*[Title/Abstract] OR retrolisthes\*[Title/Abstract] OR olisthes\*[Title/Abstract] OR adjacent segment[Title/Abstract] OR adjacent level[Title/Abstract] OR “Spine” [Mesh] OR “Cervical vertebrae” [Mesh] OR “sacrum” [Mesh] OR “Thoracic Vertebrae” [Mesh] OR “Lumbar Vertebrae” [Mesh] OR “Spondylosis” [Mesh] OR “Osteoarthritis, Spine” [Mesh] OR “Spondylolisthesis” [Mesh] OR “Spinal Cord Compression” [Mesh] OR “Radiculopathy” [Mesh] OR “Intervertebral Disc Displacement” [Mesh] OR “Spinal cord diseases” [Mesh] OR “spinal cord injuries” [Mesh] OR “spinal cord ischemia” [Mesh] OR “Thoracic Vertebrae” [Mesh]

### (b) Intervention

Surger\*[Title/Abstract] OR Decompress\*[Title/Abstract] OR discectom\*[Title/Abstract] OR discectom\*[Title/Abstract] OR lamin\*[Title/Abstract] OR fusion[Title/Abstract] OR vertebrectom\*[Title/Abstract] OR corporectom\*[Title/Abstract] OR vertebral condensation\*[Title/Abstract] OR interlaminar implant[Title/Abstract] OR interlaminar spacers[Title/Abstract] OR Interlaminar interspinous implant[Title/Abstract] OR stabilization[Title/Abstract] OR stabilization[Title/Abstract] OR cervical arthroplast\*[Title/Abstract] OR cervical disc arthroplast\*[Title/Abstract] OR “Discectomy” [Mesh] OR “spinal fusion” [Mesh] OR “surgical procedures, operative” [Mesh] OR “Laminectomy” [Mesh] OR “Total disc replacement” [Mesh] OR “Foraminotomy” [Mesh]

### (c) Study Types

Economic[Title/Abstract] OR Charge\*[Title/Abstract] OR cost\*[Title/Abstract] OR Consumer Price[Title/Abstract] OR Consumption\*[Title/Abstract] OR Pricing[Title/Abstract] OR Expenditures[Title/Abstract] OR Macroeconomic[Title/Abstract] OR Microeconomic[Title/Abstract] OR Easterlin Hypothesis[Title/Abstract] OR Decision-analytic model[Title/Abstract] OR Markov[Title/Abstract] OR Budget[Title/Abstract] OR health technolog\*[Title/Abstract] OR “Cost-Benefit Analysis” [Mesh] OR “Costs and Cost Analysis” [Mesh] OR “Economics” [Mesh] OR “Health Care Costs” [Mesh] OR “Hospital Costs” [Mesh] OR “Health Expenditures” [Mesh]

**(d) Specific guidelines**

Guideline [Title/Abstract] OR "Guidelines as Topic"[Mesh]

**(e) Specific cost-effectiveness**

Economic evaluation [Title/Abstract] OR Decision-analytic model[Title/Abstract] OR Markov[Title/Abstract] OR Cost-Benefit Analysis[Title/Abstract] OR cost-effectiveness analysis[Title/Abstract] OR "Cost-Benefit Analysis" [Mesh] OR "Costs and Cost Analysis" [Mesh] OR "Economics" [Mesh] OR "Health Care Costs" [Mesh] OR "Hospital Costs" [Mesh] OR "Health Expenditures" [Mesh]

**Final Search: (A AND B AND C) OR (D AND E)**
